# Supplementary material for: Multiple roles of humic acid in the photolysis of sulfamethoxazole: kinetics and mechanism
Source: Royal Society of Chemistry journal article supplement (doi:10.1039/d3ew00558e), 2023-01-01

## Supporting Information

### Multiple roles of humic acid in the photolysis of sulfamethoxazole: Kinetics and mechanism

Li-Jing Chen <sup>a</sup>, Chao Song <sup>b\*</sup>, Zhi-Chen Yang <sup>a</sup>, Hai-Yan Fu <sup>a</sup>, Chang  
Xu <sup>b</sup>, Xiao-Min Sun <sup>c</sup>, Shu-Guang Wang <sup>a, b, d, e\*</sup>

*<sup>a</sup> School of Environmental Science and Engineering, Xiamen University  
of Technology, Xiamen 361024, China*

*<sup>b</sup> Shandong Key Laboratory of Water Pollution Control and Resource  
Reuse, School of Environmental Science and Engineering, Shandong  
University, Qingdao 266237, China*

*<sup>c</sup> Environment Research Institute, Shandong University, Qingdao  
266237, China*

*<sup>d</sup> WeiHai Research Institute of Industrial Technology of Shandong  
University, Weihai, 264209, China*

*<sup>e</sup> Sino-French Research Institute for Ecology and Environment  
(ISFREE), School of Environmental Science and Engineering,  
Shandong University, Qingdao, Shandong, 266237, China*

---

\* Corresponding author. Tel.: +86 532 58630936; Fax: +86 532 58630907.  
E-mail address: songchao@sdu.edu.cn (Chao Song); wsg@sdu.edu.cn (Shu-Guang  
Wang)

- Fig. S1** The chemical structure of HA.
- Fig. S2** Diagram of photoreactor
- Fig. S3** Mass spectra of SMX without HA (a) or with low-concentration HA (b) after 3 h-irradiation
- Fig. S4** Mass spectra of SMX with high-concentration HA after 3 h-irradiation
- Fig. S5** Mass spectra of SMX degradation products TP 254
- Fig. S6** Mass spectra of SMX degradation products TP 99
- Fig. S7** Mass spectra of SMX degradation products TP159
- Fig. S8** Mass spectra of SMX degradation products TP185
- Fig. S9** Mass spectra of SMX degradation products TP 208 and TP 223
- Fig. S10** Mass spectra of SMX degradation products TP 228 and TP 301
- Fig. S11** Mass spectra of SMX degradation products TP110
- Fig. S12** Mass spectra of SMX degradation products TP89
- Fig. S13** Mass spectra of SMX degradation products TP 475
- Fig. S14** Mass spectra of SMX degradation products TP 301
- Fig. S15** Mass spectra of SMX degradation products TP 254 and TP 276
- Fig. S16** Mass spectra of SMX degradation products TP360
- Fig. S17** Mass spectra of SMX degradation products TP 129
- Fig. S18** Mass spectra of SMX degradation products TP 145
- Fig. S19** Mass spectra of SMX degradation products TP 121
- Fig. S20** Mass spectra of SMX degradation products TP 239
- Fig. S21** Mass spectra of SMX degradation products TP 100
- Fig. S22** Mass spectra of SMX degradation products TP 206
- Fig. S23** Mass spectra of SMX degradation products TP 142
- Fig. S24** The relative abundance of intermediates during SMX degradation:  
(a) without HA or with low-concentration HA; (b) with high-concentrations HA
- Table S1** The kinetic parameters and half-life time of SMX photolysis
- Table S2** Fukui function and CDD values of SMX without HA or with low-concentration HA
- Table S3** Fukui functions and CDD values of different SMX-HA complexes with high-concentration HA
- Table S4** Degradation intermediates of SMX without HA and with low-concentration HA
- Table S5** Degradation intermediates of SMX with high-concentrations HA

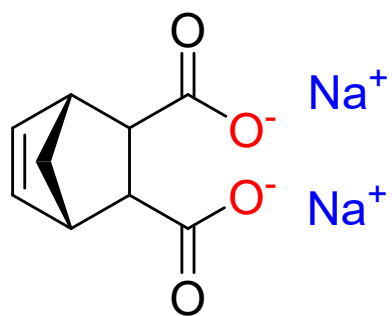

**Fig S1** The chemical structure of HA

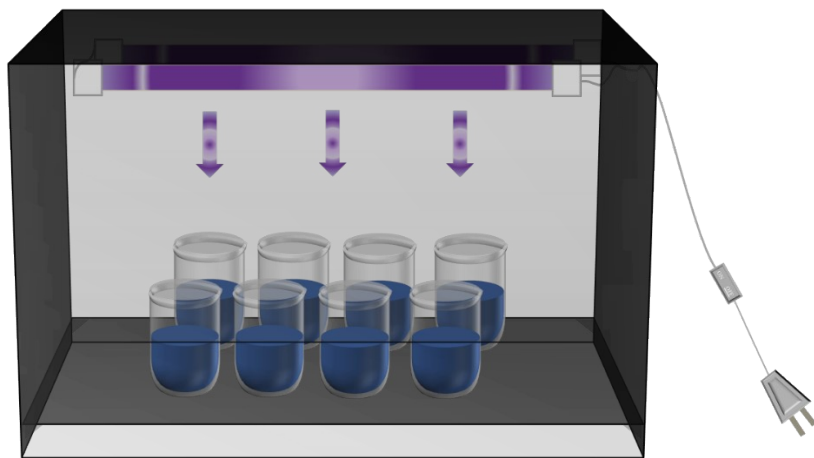

**Fig S2:** Diagram of photoreactor

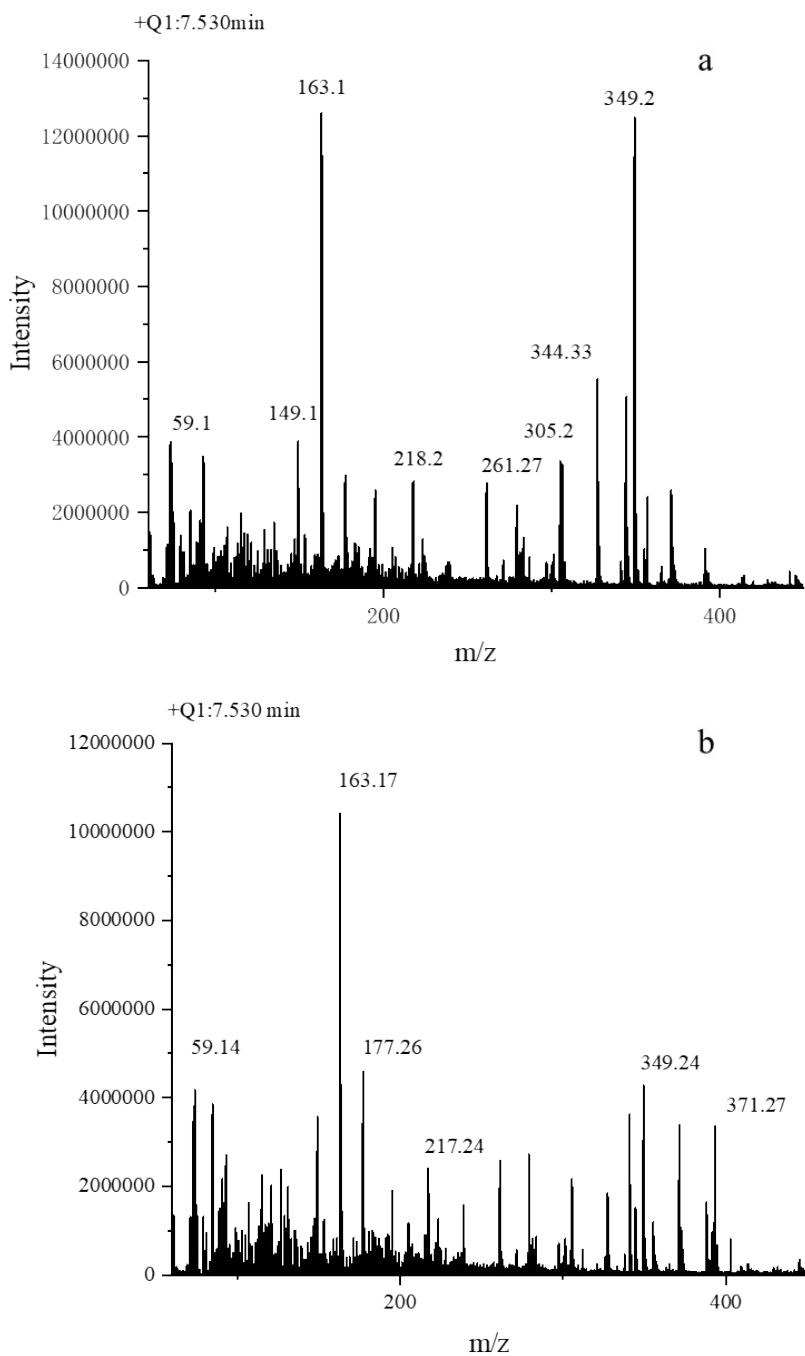

**Fig S3** Mass spectra of SMX without HA (a) or with low-concentration HA (b) after 3 h-irradiation.

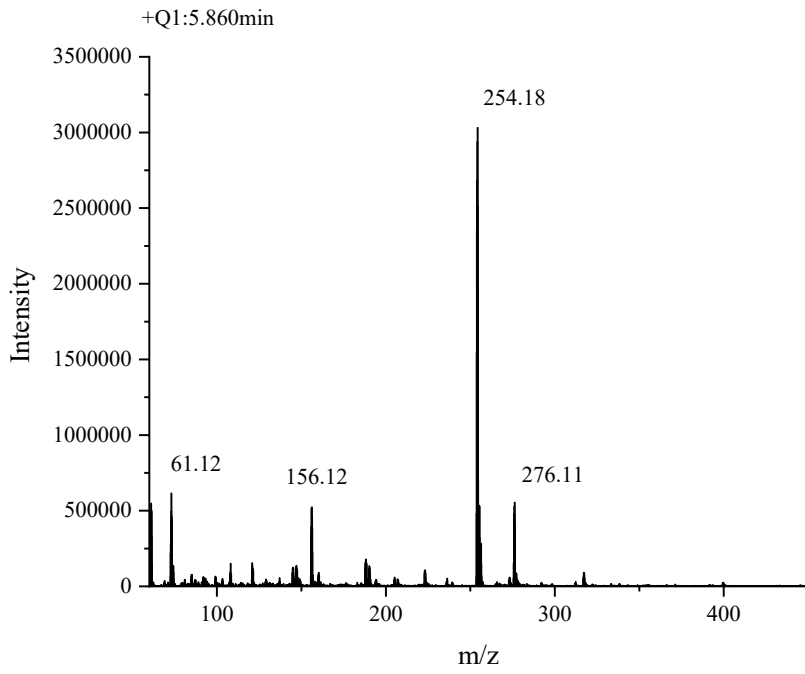

**Fig S4** Mass spectra of SMX after 3 h-irradiation with high-concentration HA.

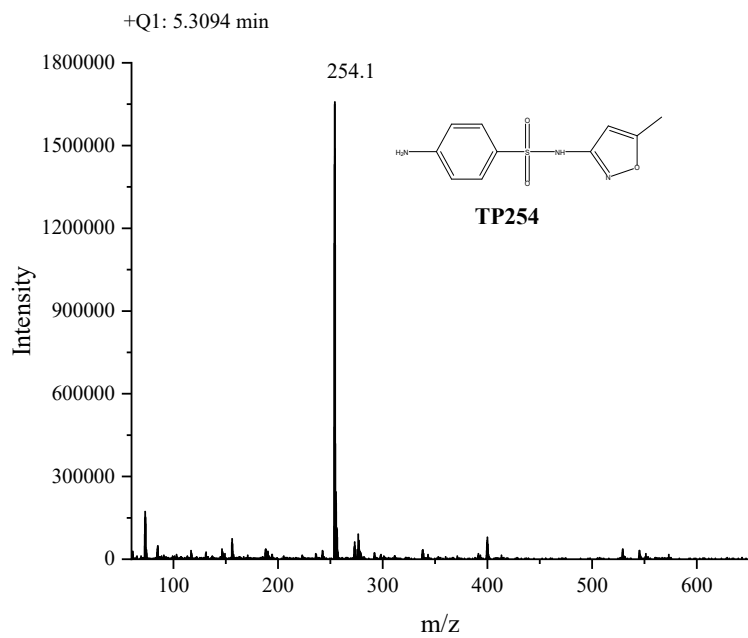

**Fig. S5** Mass spectra of SMX degradation products TP 254.

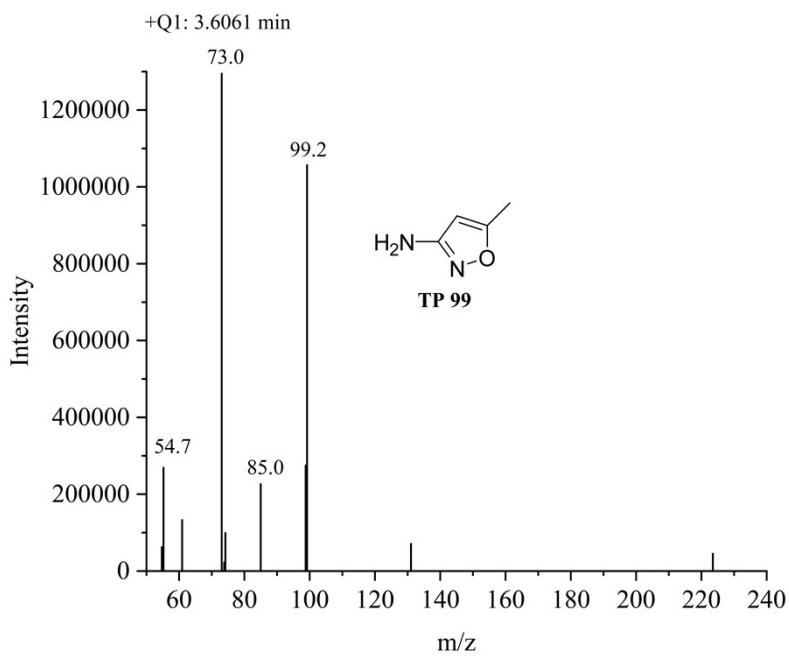

**Fig. S6** Mass spectra of SMX degradation products TP 99.



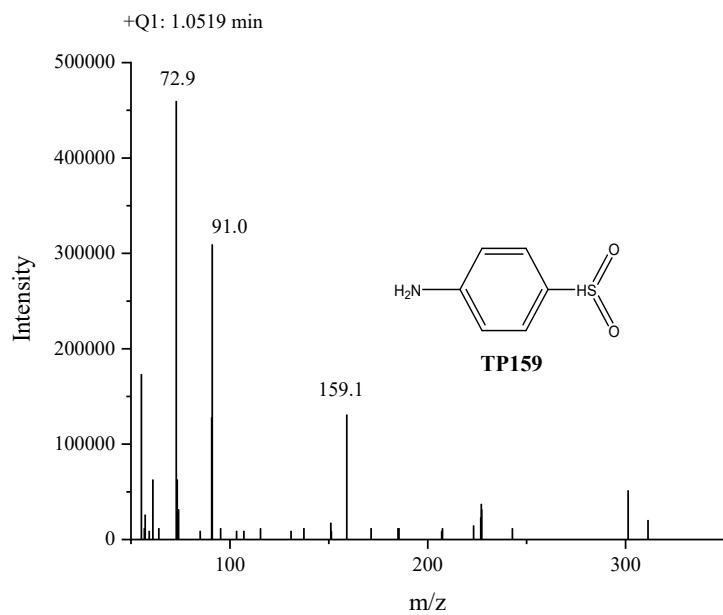

**Fig. S7** Mass spectra of SMX degradation products TP159.

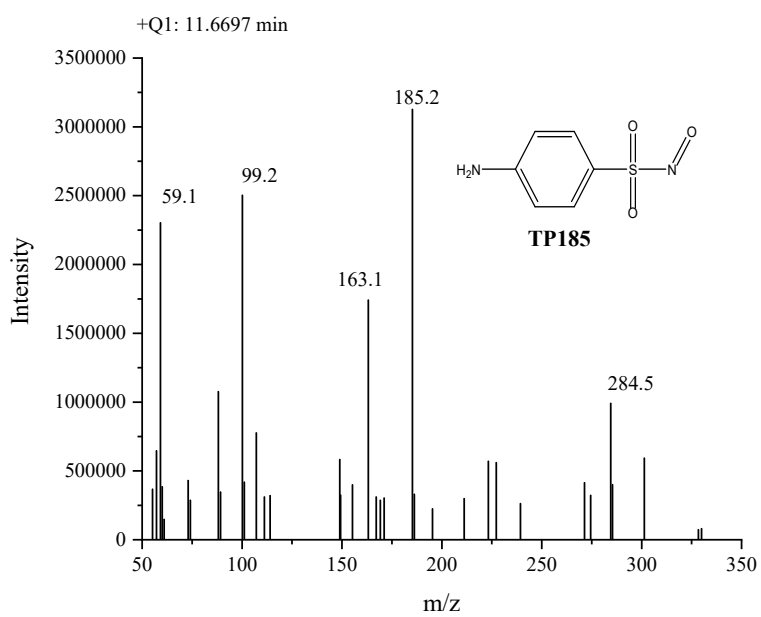

**Fig. S8** Mass spectra of SMX degradation products TP185.

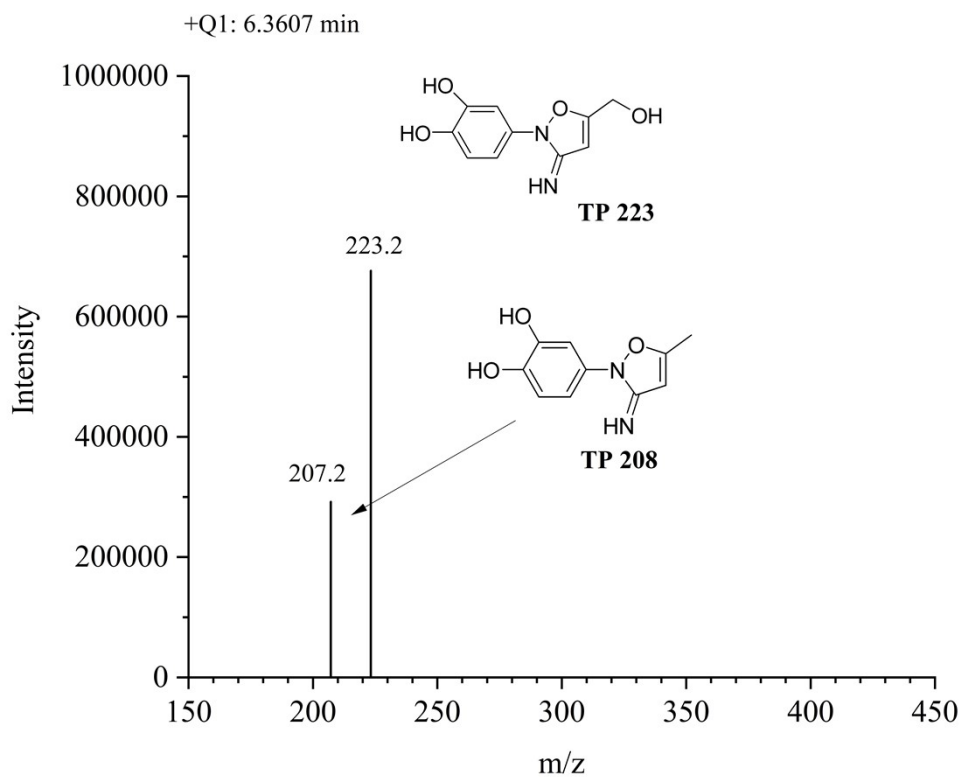

**Fig. S9** Mass spectra of SMX degradation products TP 208 and TP 223.

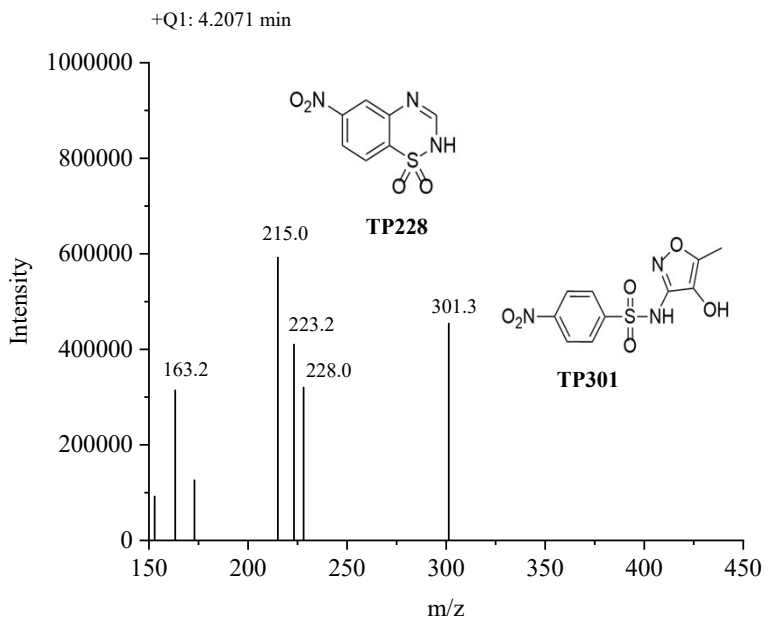

**Fig. S10** Mass spectra of SMX degradation products TP 228 and TP 301.

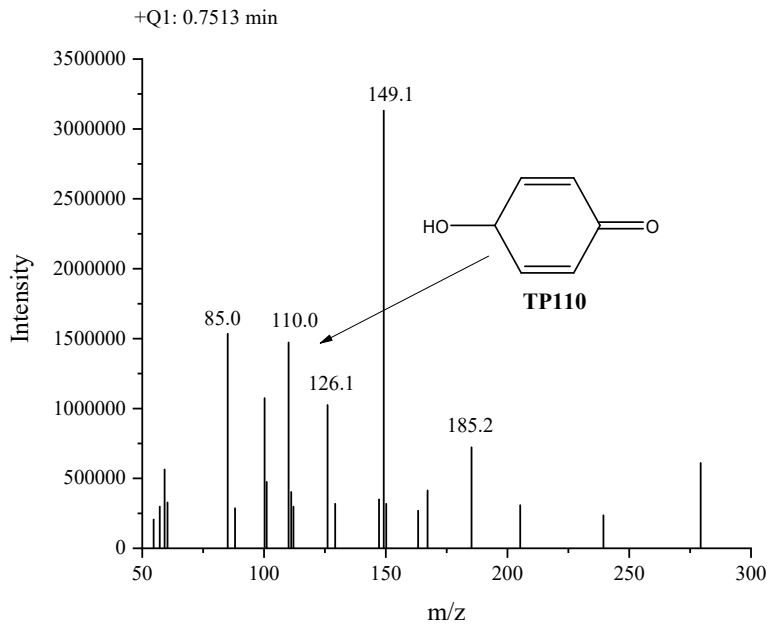

**Fig. 11** Mass spectra of SMX degradation products TP110.

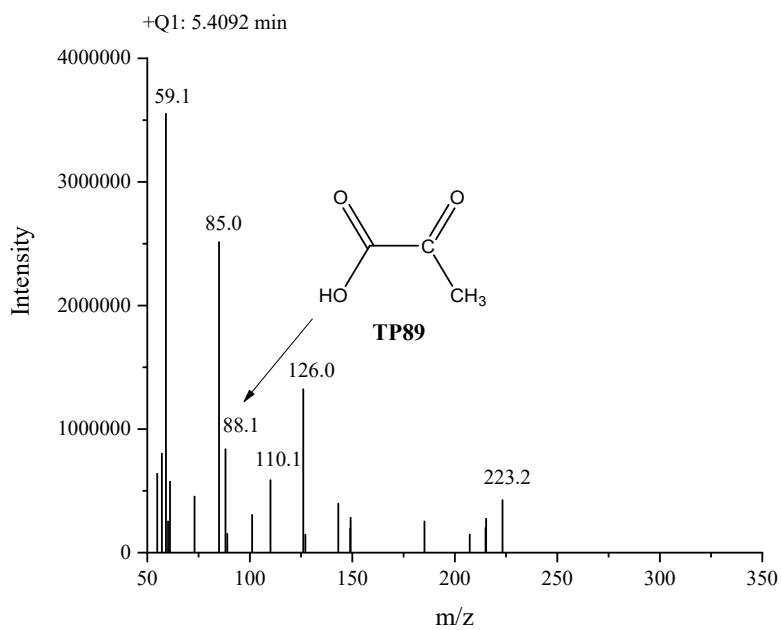

**Fig. S12** Mass spectra of SMX degradation products TP89.

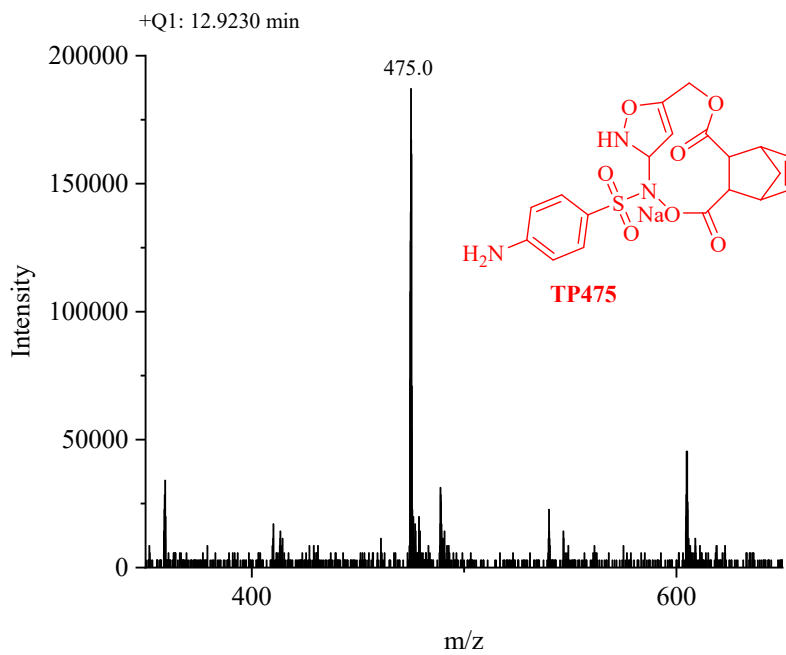

**Fig. S13** Mass spectra of SMX degradation products TP 475.

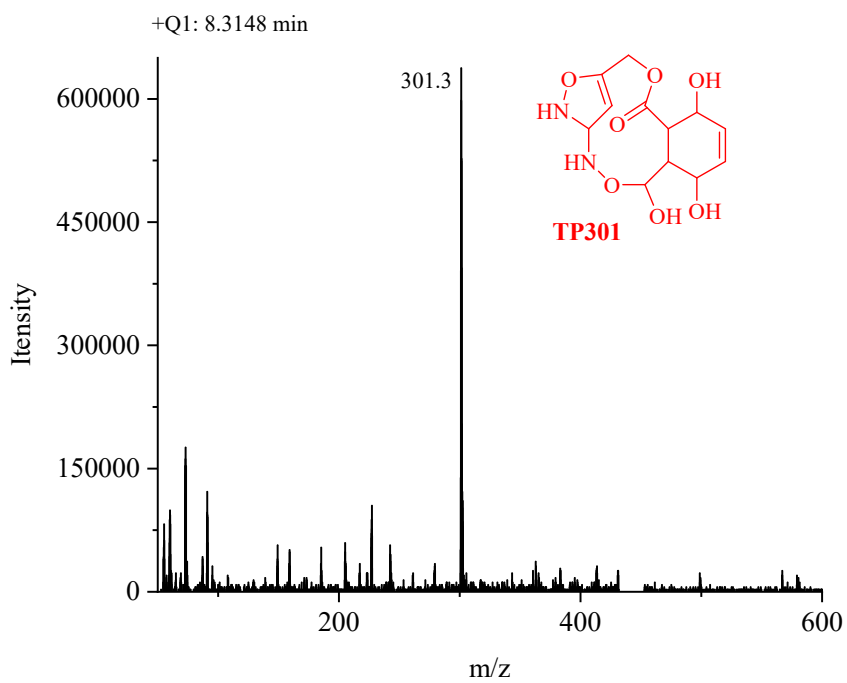

**Fig. S14** Mass spectra of SMX degradation products TP 301.



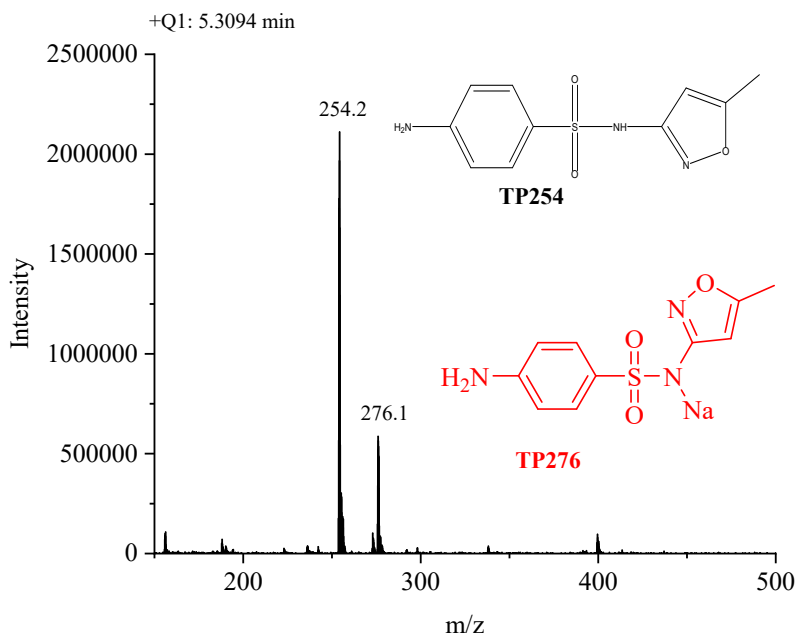

**Fig. S15** Mass spectra of SMX degradation products TP 254 and TP 276.

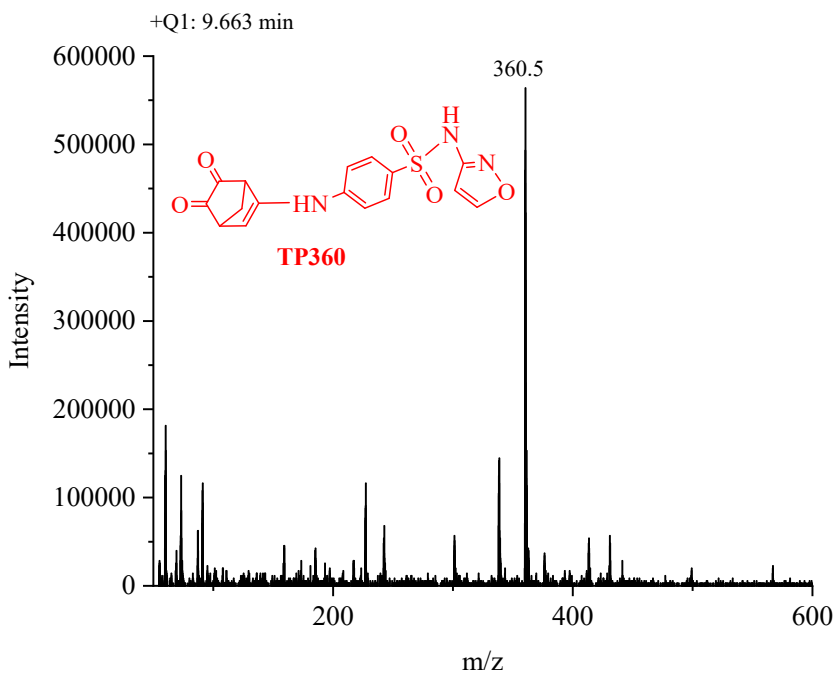

**Fig. S16** Mass spectra of SMX degradation products TP360.

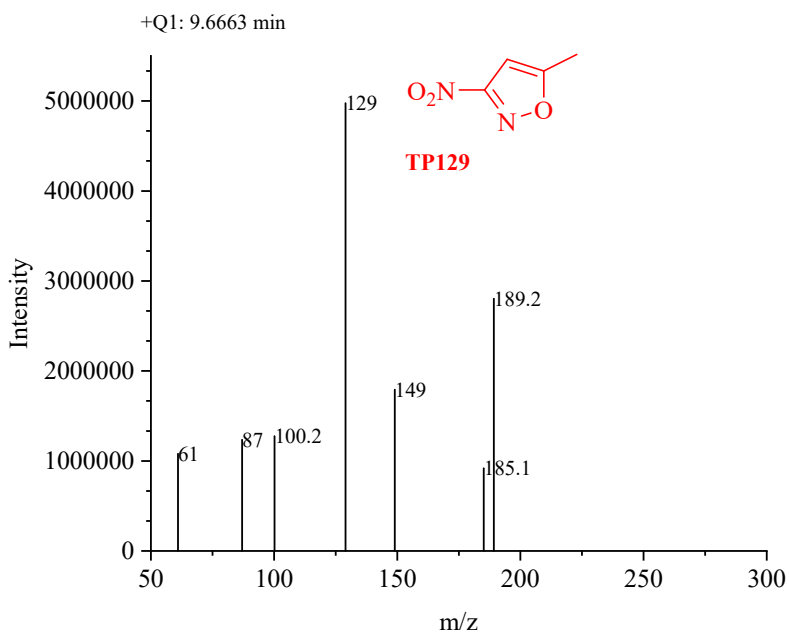

**Fig. S17** Mass spectra of SMX degradation products TP 129.

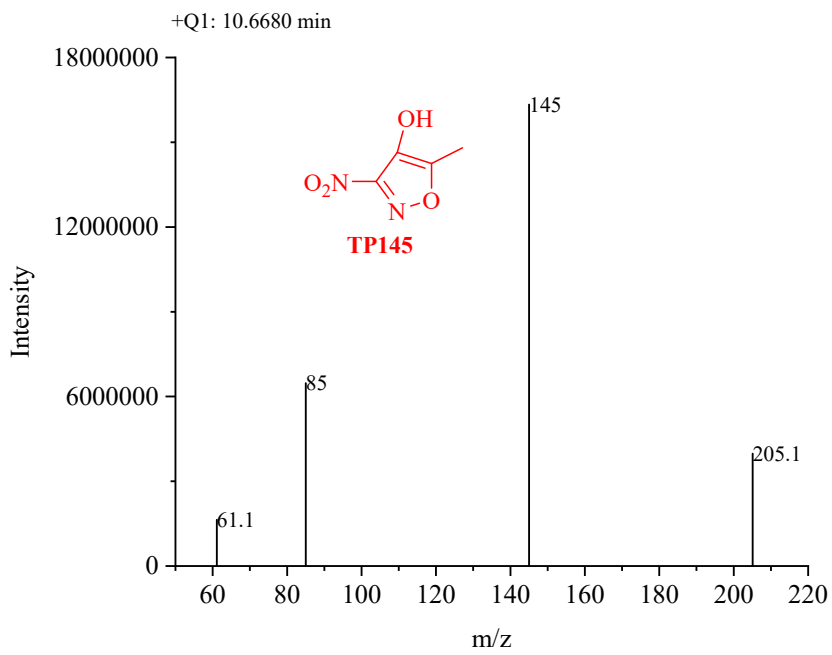

**Fig. S18** Mass spectra of SMX degradation products TP 145.

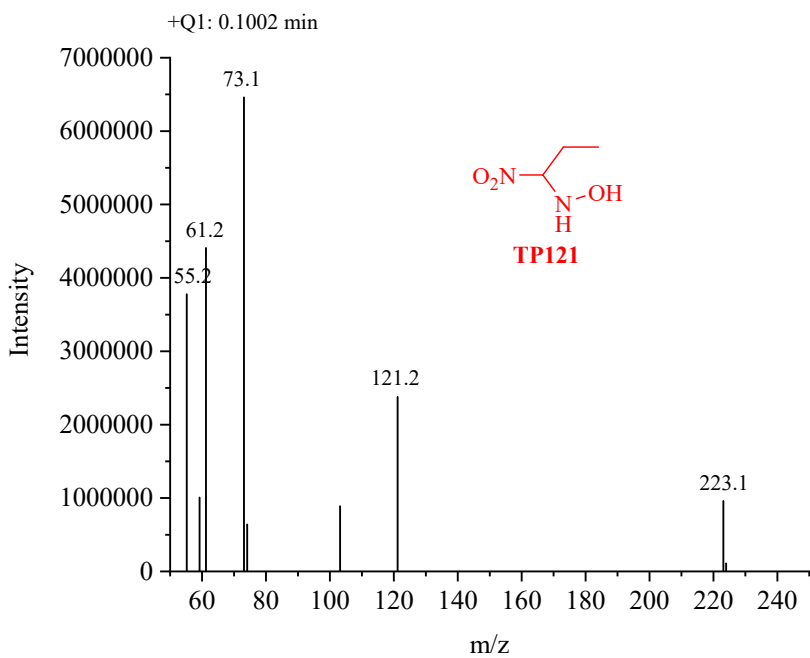

**Fig. S19** Mass spectra of SMX degradation products TP 121.

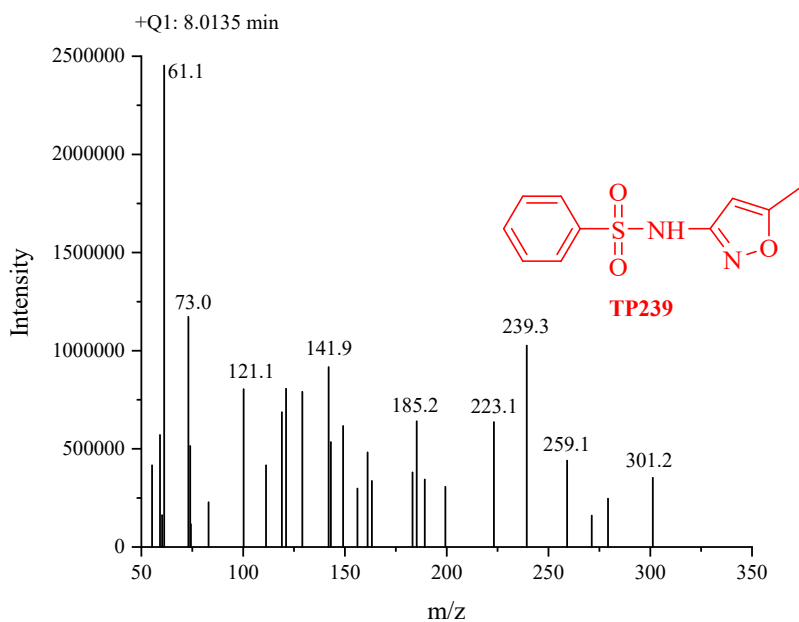

**Fig. S20** Mass spectra of SMX degradation products TP 239.

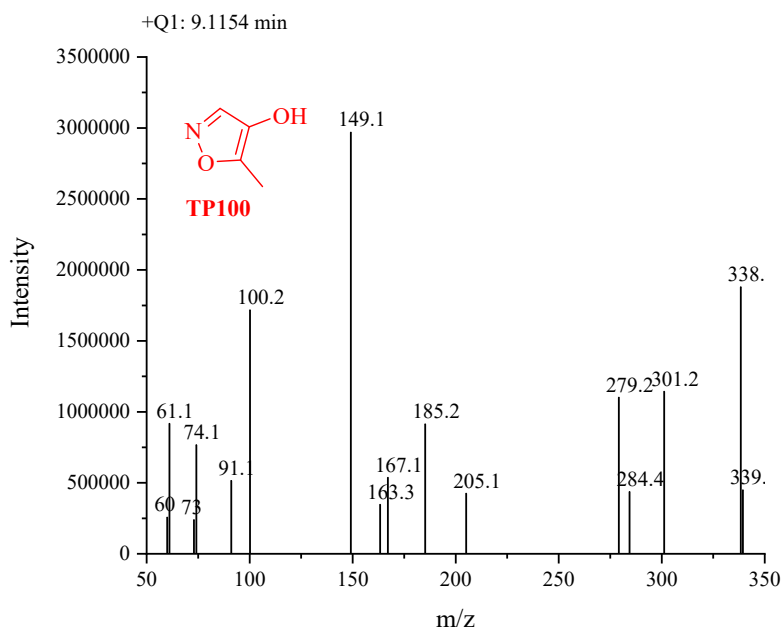

**Fig. S21** Mass spectra of SMX degradation products TP 100.

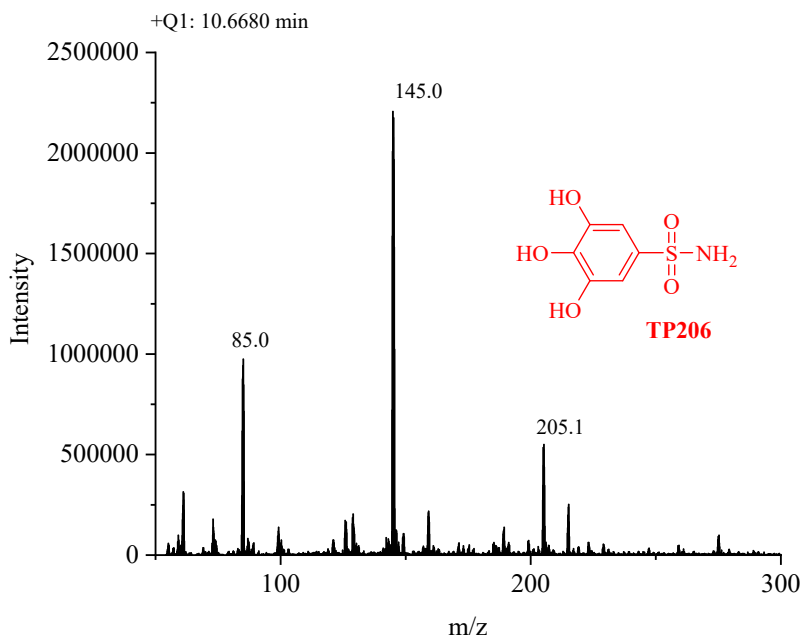

**Fig. S22** Mass spectra of SMX degradation products TP 206.



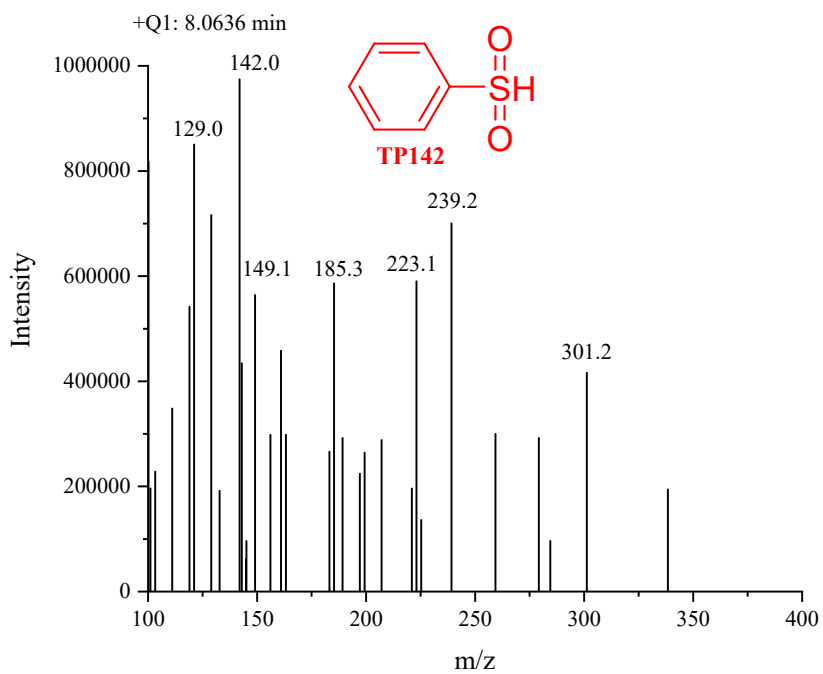

**Fig. S23** Mass spectra of SMX degradation products TP 142.

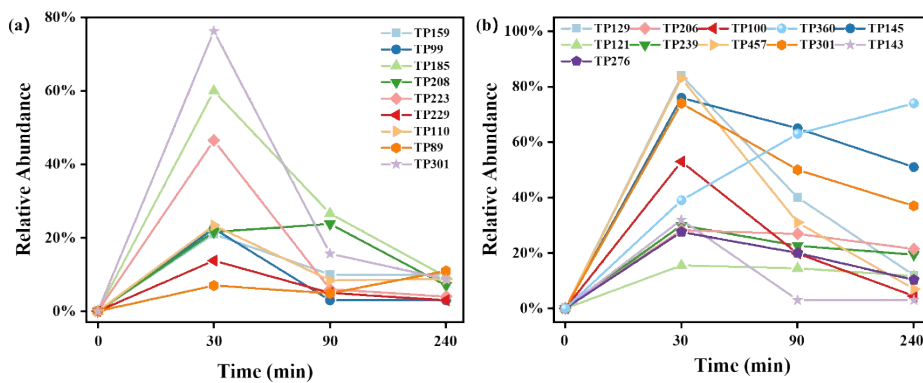

**Fig. S24** The relative abundance of intermediates during SMX degradation: (a) without HA or with low-concentration HA; (b) with high-concentrations HA

**Table S1** The kinetic parameters and half-life time of SMX photolysis.

| Groups                        | $k$ (min <sup>-1</sup> )     | $t_{1/2}$ (min)   | R <sup>2</sup> |
|-------------------------------|------------------------------|-------------------|----------------|
| SMX                           | 0.017 ± 0.0003 <sup>d</sup>  | 41.865 ± 0.8223   | 0.998          |
| SMX+HA (1mg/L)                | 0.026 ± 0.0007 <sup>a</sup>  | 26.669 ± 0.7253   | 0.995          |
| SMX+HA (10mg/L)               | 0.009 ± 0.0001 <sup>b</sup>  | 80.272 ± 0.3287   | 0.998          |
| SMX+HA (50mg/L)               | 0.004 ± 0.0001 <sup>ij</sup> | 196.67 ± 3.5506   | 0.999          |
| SMX+HA (100mg/L)              | 0.001 ± 0.0001 <sup>k</sup>  | 489.005 ± 29.2207 | 0.847          |
| SMX+IPA                       | 0.011 ± 0.0001 <sup>g</sup>  | 61.314 ± 0.2685   | 0.984          |
| SMX+THF                       | 0.015 ± 0.0001 <sup>de</sup> | 45.753 ± 0.2135   | 0.996          |
| SMX + Sorbic acid             | 0.011 ± 0.0002 <sup>g</sup>  | 63.333 ± 0.2421   | 0.998          |
| SMX+HA (1 mg/L) +IPA          | 0.013 ± 0.0001 <sup>f</sup>  | 52.593 ± 0.3863   | 0.999          |
| SMX+HA (1 mg/L) +THF          | 0.025 ± 0.0006 <sup>ab</sup> | 28.241 ± 0.6345   | 0.991          |
| SMX+HA (1 mg/L) +Sorbic acid  | 0.019 ± 0.0004 <sup>e</sup>  | 37.363 ± 0.7262   | 0.999          |
| SMX+HA (50 mg/L) +THF         | 0.004 ± 0.0003 <sup>j</sup>  | 163.229 ± 13.0051 | 0.982          |
| SMX+HA (50 mg/L) +IPA         | 0.003 ± 0.0002 <sup>i</sup>  | 239.016 ± 0.5124  | 0.988          |
| SMX+HA (50 mg/L) +Sorbic acid | 0.003 ± 0.0002 <sup>j</sup>  | 223.878 ± 11.2346 | 0.990          |

Different letters in a row demonstrate significant difference among the groups at  $p < 0.05$

**Table S2** Fukui function and CDD values of SMX without HA or with low-concentration HA.

| SMX   |                           |                |                |         |
|-------|---------------------------|----------------|----------------|---------|
| Atom  | condensed Fukui functions |                |                | CDD     |
|       | f <sup>-</sup>            | f <sup>+</sup> | f <sub>0</sub> |         |
| 1(C)  | 0.0911                    | 0.1161         | 0.1036         | 0.025   |
| 2(C)  | 0.0431                    | 0.1067         | 0.0749         | 0.0636  |
| 3(C)  | 0.0902                    | 0.0337         | 0.062          | -0.0565 |
| 4(C)  | 0.0451                    | 0.1096         | 0.0774         | 0.0645  |
| 5(C)  | 0.0912                    | 0.1168         | 0.104          | 0.0256  |
| 6(C)  | 0.0725                    | 0.0468         | 0.0597         | -0.0256 |
| 7(H)  | 0.0363                    | 0.0475         | 0.0419         | 0.0112  |
| 8(H)  | 0.0226                    | 0.0416         | 0.0321         | 0.019   |
| 9(H)  | 0.0243                    | 0.0439         | 0.0341         | 0.0196  |
| 10(H) | 0.0363                    | 0.0476         | 0.0419         | 0.0114  |
| 11(N) | 0.1895                    | 0.0277         | 0.1086         | -0.1618 |
| 12(H) | 0.0564                    | 0.0166         | 0.0365         | -0.0398 |
| 13(H) | 0.0563                    | 0.0165         | 0.0364         | -0.0398 |
| 14(S) | 0.0218                    | 0.0169         | 0.0194         | -0.0048 |
| 15(O) | 0.0269                    | 0.0227         | 0.0248         | -0.0042 |
| 16(O) | 0.0298                    | 0.0215         | 0.0257         | -0.0082 |
| 17(N) | 0.0175                    | 0.011          | 0.0143         | -0.0065 |
| 18(H) | 0.0109                    | 0.0091         | 0.01           | -0.0018 |
| 19(C) | 0.006                     | 0.0176         | 0.0118         | 0.0116  |
| 20(C) | 0.005                     | 0.0268         | 0.0159         | 0.0218  |
| 21(H) | 0.0033                    | 0.0088         | 0.006          | 0.0055  |
| 22(N) | 0.0066                    | 0.025          | 0.0158         | 0.0184  |
| 23(C) | 0.0037                    | 0.0205         | 0.0121         | 0.0167  |
| 24(O) | 0.0078                    | 0.0214         | 0.0146         | 0.0136  |
| 25(C) | 0.0017                    | 0.0079         | 0.0048         | 0.0062  |
| 26(H) | 0.0014                    | 0.0073         | 0.0044         | 0.0058  |
| 27(H) | 0.0014                    | 0.0077         | 0.0045         | 0.0064  |
| 28(H) | 0.0013                    | 0.0046         | 0.003          | 0.0033  |

**Table S3** Fukui functions and CDD values of different SMX-HA complexes with high-concentration HA.

| Atom   | Configuration a           |                |                |         | Configuration b           |                |                |         | Configuration c           |                |                |         |
|--------|---------------------------|----------------|----------------|---------|---------------------------|----------------|----------------|---------|---------------------------|----------------|----------------|---------|
|        | condensed Fukui functions |                |                | CDD     | condensed Fukui functions |                |                | CDD     | condensed Fukui functions |                |                | CDD     |
|        | f <sup>-</sup>            | f <sup>+</sup> | f <sub>0</sub> |         | f <sup>-</sup>            | f <sup>+</sup> | f <sub>0</sub> |         | f <sup>-</sup>            | f <sup>+</sup> | f <sub>0</sub> |         |
| 1(C)   | 0.0305                    | 0.0085         | 0.0195         | -0.022  | 0.0213                    | 0.0078         | 0.0145         | -0.0135 | -0.0093                   | 0.0087         | -0.0003        | 0.018   |
| 2(C)   | 0.0142                    | 0.0065         | 0.0104         | -0.0077 | 0.0136                    | 0.006          | 0.0098         | -0.0075 | -0.007                    | 0.0149         | 0.004          | 0.0219  |
| 3(C)   | 0.0316                    | 0.0064         | 0.019          | -0.0252 | 0.0339                    | 0.0052         | 0.0196         | -0.0287 | 0.0089                    | 0.0168         | 0.0129         | 0.008   |
| 4(C)   | 0.0164                    | 0.0094         | 0.0129         | -0.0069 | 0.0211                    | 0.0131         | 0.0171         | -0.008  | 0.0146                    | 0.0202         | 0.0174         | 0.0055  |
| 5(C)   | 0.0306                    | 0.0068         | 0.0187         | -0.0239 | 0.0231                    | 0.0085         | 0.0158         | -0.0146 | 0.0136                    | 0.0105         | 0.012          | -0.0031 |
| 6(C)   | 0.0245                    | 0.0144         | 0.0194         | -0.0101 | 0.0123                    | 0.0116         | 0.0119         | -0.0007 | 0.0027                    | 0.0143         | 0.0085         | 0.0116  |
| 11(N)  | 0.063                     | 0.0118         | 0.0374         | -0.0512 | 0.0472                    | 0.0108         | 0.029          | -0.0364 | 0.0103                    | -0.0001        | 0.0051         | -0.0103 |
| 14(S)  | 0.0069                    | 0.0075         | 0.0072         | 0.0005  | 0.0104                    | 0.0169         | 0.0137         | 0.0065  | 0.0051                    | 0.017          | 0.011          | 0.0119  |
| 15(O)  | 0.0197                    | 0.0103         | 0.015          | -0.0094 | 0.0256                    | 0.022          | 0.0238         | -0.0035 | 0.0205                    | 0.0226         | 0.0215         | 0.0021  |
| 16(O)  | 0.0123                    | 0.0087         | 0.0105         | -0.0036 | 0.019                     | 0.016          | 0.0175         | -0.0031 | -0.0021                   | 0.0164         | 0.0072         | 0.0185  |
| 17(N)  | 0.0063                    | -0.0005        | 0.0029         | -0.0068 | 0.006                     | 0.0105         | 0.0083         | 0.0045  | 0.0047                    | 0.0067         | 0.0057         | 0.002   |
| 19(C)  | -0.0002                   | -0.0048        | -0.0025        | -0.0046 | 0.0087                    | 0.0192         | 0.0139         | 0.0105  | 0.0084                    | 0.0169         | 0.0126         | 0.0084  |
| 20(C)  | 0.0049                    | -0.0019        | 0.0015         | -0.0068 | 0.0087                    | 0.0298         | 0.0192         | 0.0211  | 0.0069                    | 0.0287         | 0.0178         | 0.0218  |
| 22(N)  | 0.0024                    | 0.0089         | 0.0057         | 0.0064  | -0.0145                   | 0.024          | 0.0047         | 0.0386  | -0.0192                   | 0.0146         | -0.0023        | 0.0337  |
| 23(C)  | -0.0031                   | 0.0011         | -0.001         | 0.0042  | 0.0015                    | 0.0245         | 0.013          | 0.023   | 0.0028                    | 0.0145         | 0.0086         | 0.0117  |
| 24(O)  | 0.0107                    | 0.0068         | 0.0087         | -0.0039 | -0.0012                   | 0.0184         | 0.0086         | 0.0195  | -0.007                    | 0.0191         | 0.006          | 0.0261  |
| 25(C)  | 0.0037                    | 0.001          | 0.0023         | -0.0027 | 0.0038                    | 0.0092         | 0.0065         | 0.0054  | 0.0032                    | 0.0096         | 0.0064         | 0.0063  |
| 29(C)  | 0.0746                    | 0.0061         | 0.0403         | -0.0685 | 0.0608                    | 0.0057         | 0.0333         | -0.0551 | 0.0894                    | 0.0055         | 0.0475         | -0.0839 |
| 30(C)  | 0.0108                    | 0.0036         | 0.0072         | -0.0072 | 0.0092                    | 0.0022         | 0.0057         | -0.0071 | 0.0192                    | 0.0017         | 0.0105         | -0.0175 |
| 31(C)  | 0.0119                    | 0.0001         | 0.006          | -0.0118 | 0.0177                    | 0              | 0.0089         | -0.0177 | 0.0166                    | 0.0002         | 0.0084         | -0.0164 |
| 32(C)  | 0.0112                    | 0.0018         | 0.0065         | -0.0094 | 0.0093                    | 0.0014         | 0.0054         | -0.0079 | 0.0117                    | -0.0007        | 0.0055         | -0.0125 |
| 33(C)  | 0.0136                    | 0.001          | 0.0073         | -0.0126 | 0.0137                    | 0.0014         | 0.0076         | -0.0123 | 0.0162                    | 0.0025         | 0.0093         | -0.0137 |
| 34(C)  | 0.0747                    | -0.0043        | 0.0352         | -0.079  | 0.067                     | -0.0009        | 0.0331         | -0.0679 | 0.0806                    | 0.0066         | 0.0436         | -0.074  |
| 35(C)  | 0.0165                    | -0.0003        | 0.0081         | -0.0168 | 0.0222                    | -0.0008        | 0.0107         | -0.023  | 0.006                     | 0.0037         | 0.0048         | -0.0023 |
| 36(O)  | 0.0741                    | 0.0045         | 0.0393         | -0.0696 | 0.0418                    | 0.0012         | 0.0215         | -0.0406 | 0.0239                    | -0.0001        | 0.0119         | -0.024  |
| 37(C)  | 0.0029                    | 0.0066         | 0.0048         | 0.0036  | 0.0105                    | 0.0052         | 0.0078         | -0.0053 | 0.0338                    | 0.0001         | 0.0169         | 0.0337  |
| 38(O)  | 0.0222                    | -0.0013        | 0.0105         | -0.0235 | 0.0532                    | 0.0002         | 0.0267         | -0.053  | 0.13                      | -0.0013        | 0.0643         | 0.1313  |
| 39(O)  | 0.0399                    | 0.0047         | 0.0223         | -0.0352 | 0.084                     | 0.0027         | 0.0434         | -0.0813 | 0.0419                    | -0.0019        | 0.02           | 0.0438  |
| 40(O)  | 0.0282                    | -0.0004        | 0.0139         | -0.0286 | 0.0339                    | 0.0031         | 0.0185         | -0.0308 | 0.1246                    | 0.0059         | 0.0653         | 0.1187  |
| 41(C)  | 0.013                     | 0.0057         | 0.0093         | -0.0073 | 0.0124                    | 0.0035         | 0.0079         | -0.0089 | 0.0225                    | 0.0019         | 0.0122         | 0.0205  |
| 50(Na) | 0.0338                    | 0.7987         | 0.4162         | 0.7649  | 0.0481                    | 0.6002         | 0.3241         | 0.5521  | 0.0377                    | 0.0139         | 0.0258         | 0.0238  |
| 51(Na) | 0.026                     | 0.0115         | 0.0188         | -0.0144 | 0.025                     | 0.009          | 0.017          | -0.016  | 0.035                     | 0.5754         | 0.3052         | 0.5404  |

**Table S4** Degradation intermediates of SMX without HA and with low-concentration HA

| Compound | [M+H] <sup>+</sup> | Retention time (min) | Proposed formula                                                | Molecular structure                                                                  |
|----------|--------------------|----------------------|-----------------------------------------------------------------|--------------------------------------------------------------------------------------|
| TP254    | 254                | 5.3                  | C <sub>10</sub> H <sub>11</sub> N <sub>3</sub> O <sub>3</sub> S | 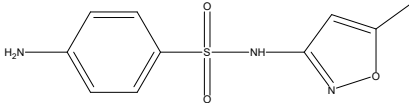   |
| TP159    | 159                | 1.0                  | C <sub>6</sub> H <sub>7</sub> NO <sub>2</sub> S                 |    |
| TP99     | 99                 | 3.6                  | C <sub>4</sub> H <sub>6</sub> N <sub>2</sub> O                  |    |
| TP185    | 185                | 11.6                 | C <sub>6</sub> H <sub>6</sub> N <sub>2</sub> O <sub>3</sub> S   |    |
| TP208    | 207                | 6.3                  | C <sub>10</sub> H <sub>10</sub> N <sub>2</sub> O <sub>3</sub>   |   |
| TP223    | 223                | 6.3                  | C <sub>10</sub> H <sub>10</sub> N <sub>2</sub> O <sub>4</sub>   |  |
| TP229    | 228                | 4.2                  | C <sub>7</sub> H <sub>5</sub> N <sub>3</sub> O <sub>4</sub> S   |  |
| TP110    | 110                | 0.7                  | C <sub>6</sub> H <sub>6</sub> O <sub>2</sub>                    |  |
| TP89     | 88                 | 5.4                  | C <sub>3</sub> H <sub>4</sub> O <sub>3</sub>                    |  |
| TP301    | 301                | 0.7                  | C <sub>10</sub> H <sub>9</sub> N <sub>3</sub> O <sub>6</sub> S  |  |

**Table S5** Degradation intermediates of SMX with high-concentrations HA

| Compound | [M+H] <sup>+</sup> | Retention time (min) | Proposed formula                                                      | Molecular structure                                                                  |
|----------|--------------------|----------------------|-----------------------------------------------------------------------|--------------------------------------------------------------------------------------|
| TP129    | 129                | 9.6                  | C <sub>4</sub> H <sub>4</sub> N <sub>2</sub> O <sub>3</sub>           | 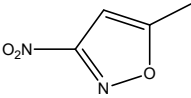   |
| TP145    | 145                | 10.6                 | C <sub>4</sub> H <sub>4</sub> N <sub>2</sub> O <sub>4</sub>           |    |
| TP121    | 121                | 0.1                  | C <sub>3</sub> H <sub>8</sub> N <sub>2</sub> O <sub>3</sub>           |    |
| TP239    | 239                | 8.0                  | C <sub>10</sub> H <sub>10</sub> N <sub>2</sub> O <sub>3</sub><br>S    |    |
| TP206    | 205                | 10.6                 | C <sub>6</sub> H <sub>7</sub> NO <sub>5</sub> S                       |   |
| TP100    | 100                | 9.1                  | C <sub>4</sub> H <sub>5</sub> NO <sub>2</sub>                         |  |
| TP457    | 457                | 12.9                 | C <sub>19</sub> H <sub>19</sub> N <sub>3</sub> Na<br>O <sub>7</sub> S |  |
| TP301    | 301                | 8.3                  | C <sub>12</sub> H <sub>16</sub> N <sub>2</sub> O <sub>7</sub>         |  |
| TP143    | 142                | 8.0                  | C <sub>6</sub> H <sub>6</sub> O <sub>2</sub> S                        |  |

---

TP276

276

5.3

$C_{10}H_{10}N_3Na$   
 $O_3S$

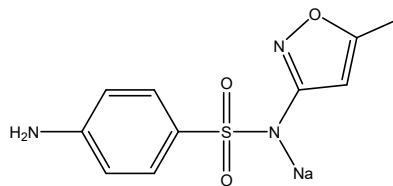

TP360

360

9.6

$C_{16}H_{13}N_3O_5$   
S

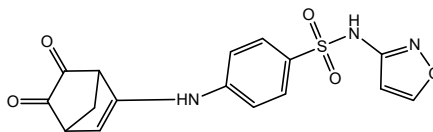

Supplement: d3ew00558e1.pdf [file d3ew00558e1.pdf]
